# Supplementary material
Source: Springer Nature journal article supplement (https://www.springermedizin.de/resource/supplementary/12911_2013_776_MOESM6_ESM.pdf/9526298)

—●— Weekly incidence rates of ILIs (cases per 100 000 inhabitants) (left ordinate axis)  
— Positivity rates from virological sampling (a simple red dot corresponds to a positivity rate of 0%) (right ordinate axis)  
— Number of virological samples

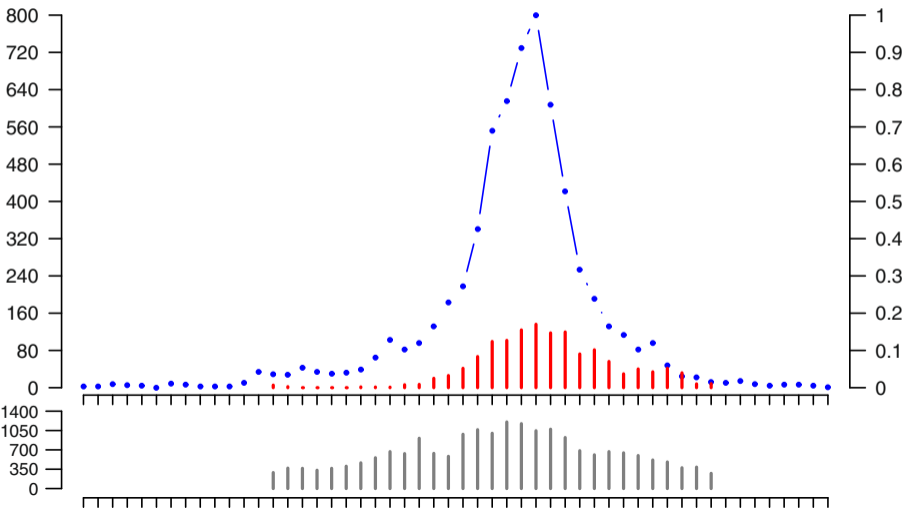

Supplement: MOESM6 [file 9526298]
